# Supplementary material for: Pan-genome analyses of 24 Shewanella strains re-emphasize the diversification of their functions yet evolutionary dynamics of metal-reducing pathway
Source: PubMed Central journal article supplement (PMC6048853; doi:10.1186/s13068-018-1201-1), 2018-07-17

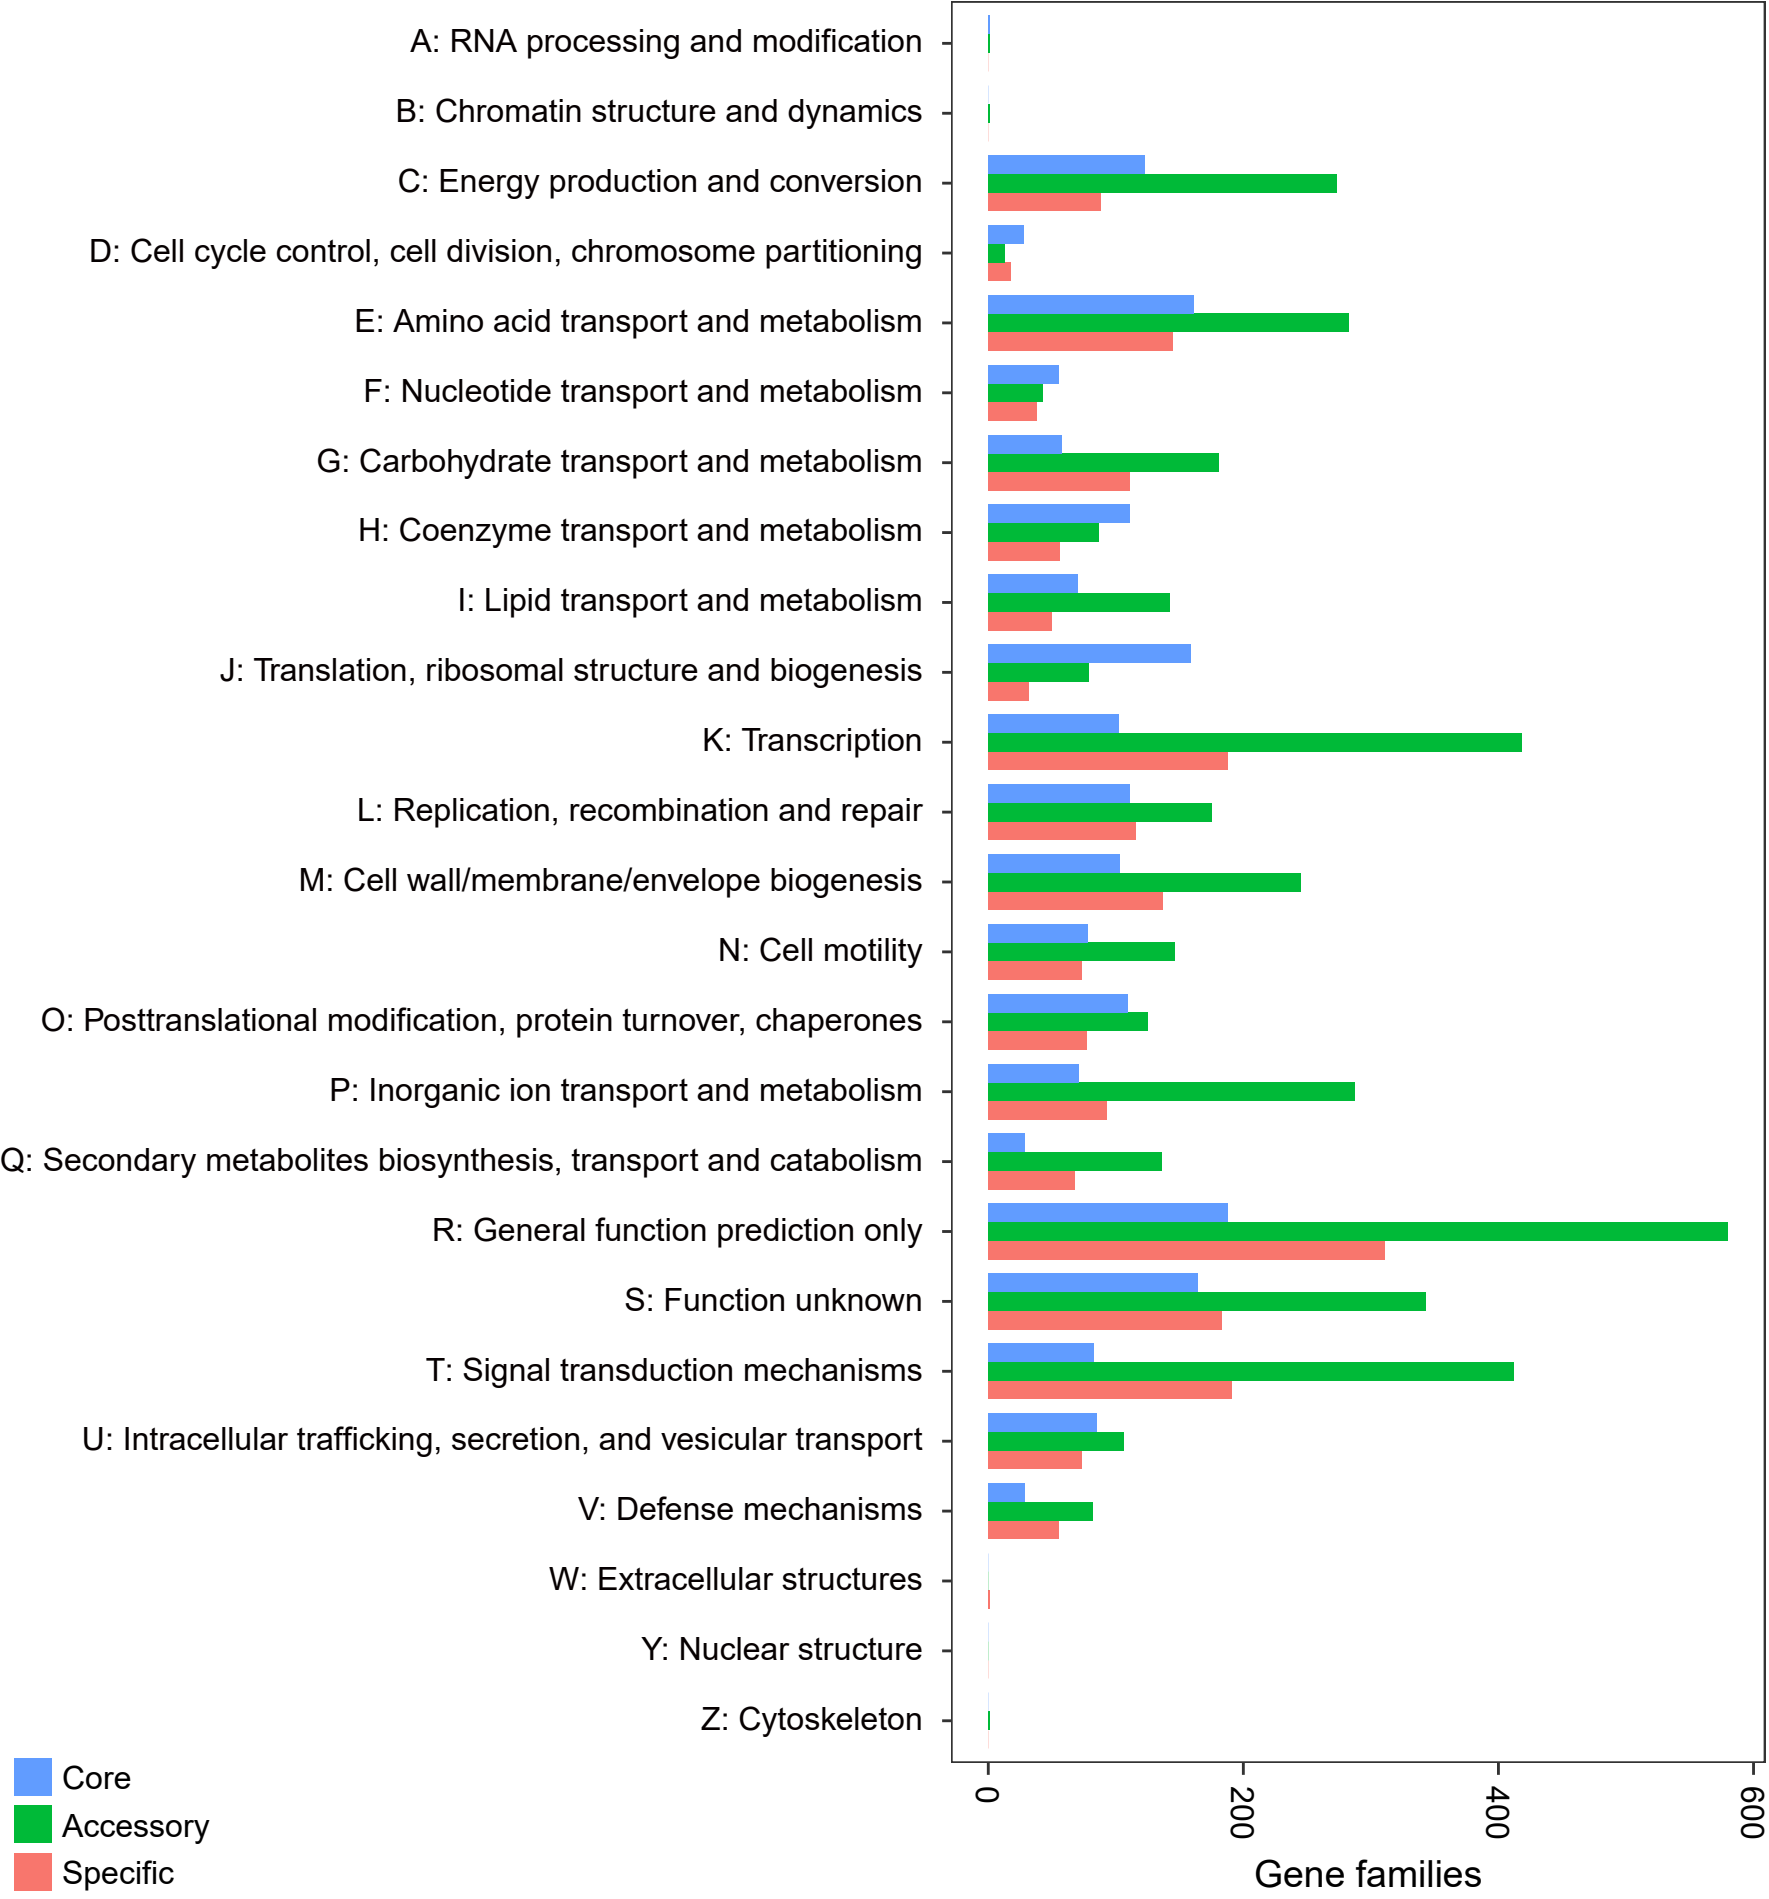

Supplement: 13068_2018_1201_MOESM2_ESM.pdf [file 13068_2018_1201_MOESM2_ESM.pdf]
