# Supplementary material for: Pan-genome analyses of 24 Shewanella strains re-emphasize the diversification of their functions yet evolutionary dynamics of metal-reducing pathway
Source: Biotechnol Biofuels. 2018 Jul 17;11:193. doi: 10.1186/s13068-018-1201-1 (PMC6048853; doi:10.1186/s13068-018-1201-1)
Supplement: Supplementary file 4 — Additional file 4: Table S2. Possible donors of HGT genes in each strain. [file 13068_2018_1201_MOESM4_ESM.xlsx]

## Sheet: all_24_HGT.donor_matrix
Table S2. Possible donors of HGT genes in each strain.
Strains	HGT genes	Vibrionales	Enterobacteriales	Chromatiales	Aeromonadales	Pseudomonadales	Oceanospirillales	Opitutales	Cellvibrionales	Burkholderiales	Actiniaria	Thiotrichales	Micrococcales	Xanthomonadales
S. baltica BA175	6	1	1	3	1	0	0	0	0	0	0	0	0	0
S. baltica OS155	58	30	25	0	0	1	0	0	1	0	1	0	0	0
S. baltica OS117	42	15	25	0	0	0	0	0	1	0	1	0	0	0
S. baltica OS223	292	5	0	0	1	0	0	0	0	0	0	0	0	0
S. baltica OS678	30	26	3	0	1	0	0	0	0	0	0	0	0	0
S. baltica OS195	36	30	3	1	2	0	0	0	0	0	0	0	0	0
S. baltica OS185	375	9	1	0	1	0	0	0	0	0	0	0	0	0
S. sp. W3-18-1	28	16	6	2	1	2	1	0	0	0	0	0	0	0
S. putrefaciens CN-32	27	5	13	5	1	2	0	0	1	0	0	0	0	0
S. putrefaciens 200	35	21	8	1	1	4	0	0	0	0	0	0	0	0
S. sp. MR-7	183	6	0	1	0	0	0	0	0	0	0	1	0	0
S. sp. MR-4	11	10	0	1	0	0	0	0	0	0	0	0	0	0
S. sp. ANA-3	21	2	0	0	10	8	0	0	0	0	0	0	0	1
S. oneidensis MR-1	59	49	0	7	1	0	1	0	0	0	0	0	1	0
S. frigidimarina NCIMB 400	13	2	3	0	0	1	1	3	0	2	0	0	0	0
S. denitrificans OS217	14	10	1	0	1	1	1	0	0	0	0	0	0	0
S. amazonensis SB2B	4	3	1	0	0	0	0	0	0	0	0	0	0	0
S. violacea DSS12	7	7	0	0	0	0	0	0	0	0	0	0	0	0
S. woodyi ATCC 51908	204	1	0	0	0	0	0	0	0	0	0	0	0	0
S. sediminis HAW-EB3	160	1	0	0	0	0	0	0	0	0	0	0	0	0
S. halifaxensis HAW-EB4	6	6	0	0	0	0	0	0	0	0	0	0	0	0
S. pealeana ATCC 700345	2	2	0	0	0	0	0	0	0	0	0	0	0	0
S. piezotolerans WP3	187	0	0	0	0	0	0	0	0	0	0	0	0	0
S. loihica PV-4	0	0	0	0	0	0	0	0	0	0	0	0	0	0
